# Supplementary material for: Identification of Terpenoid Chemotypes Among High (−)-trans-Δ9- Tetrahydrocannabinol-Producing Cannabis sativa L. Cultivars
Source: PubMed Central journal article supplement (PMC5436332; doi:10.1089/can.2016.0040), 2017-03-01

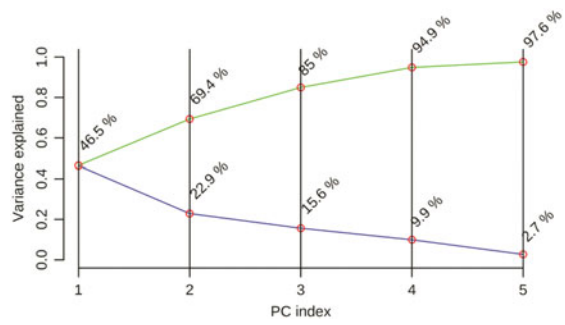

**SUPPLEMENTARY FIG. S2.** Principal component total variance explained (green line) and individual component variation explained (blue line).

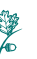

Supplement: Supp_Fig2.pdf [file Supp_Fig2.pdf]
