# Supplementary material for: Identification of Terpenoid Chemotypes Among High (−)-trans-Δ9- Tetrahydrocannabinol-Producing Cannabis sativa L. Cultivars
Source: PubMed Central journal article supplement (PMC5436332; doi:10.1089/can.2016.0040), 2017-03-01

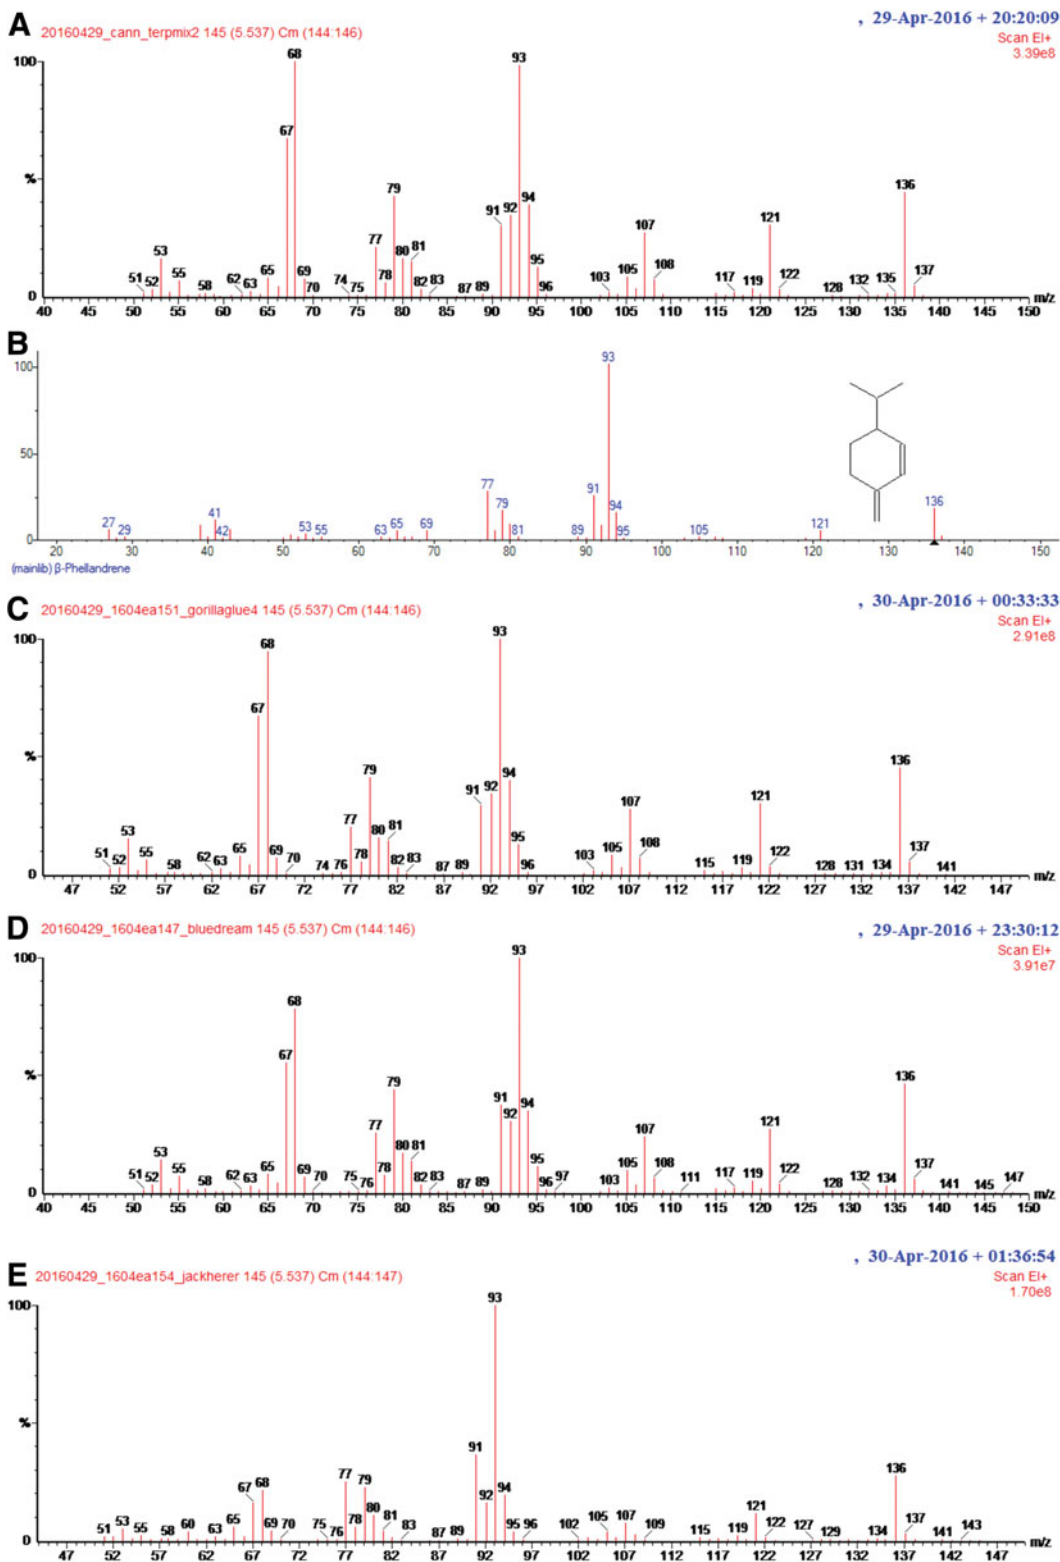

**SUPPLEMENTARY FIG. S3.** (A) Mass spectrum of limonene in CannTerpMix 2. (B) Mass spectrum of  $\beta$ -phellandrene in NIST library Version 2.0. (C) Limonene peak in a sample of Gorilla Glue #4. (D) Limonene peak in a sample of Blue Dream. (E) Peak containing  $\beta$ -phellandrene overlapping with limonene in Jack Herer sample.

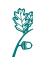

Supplement: Supp_Fig3.pdf [file Supp_Fig3.pdf]
