# Supplementary material for: Identification of Terpenoid Chemotypes Among High (−)-trans-Δ9- Tetrahydrocannabinol-Producing Cannabis sativa L. Cultivars
Source: PubMed Central journal article supplement (PMC5436332; doi:10.1089/can.2016.0040), 2017-03-01

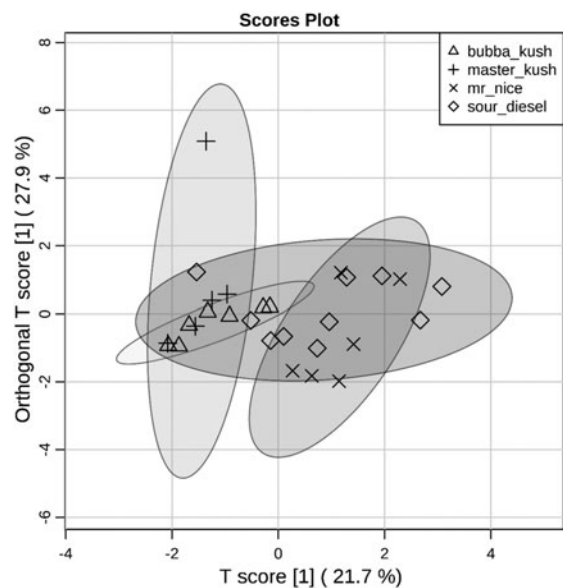

**SUPPLEMENTARY FIG. S4.** OPLS-DA analysis of bisabolol group with cultivar names as classes. OPLS-DA, orthogonal partial least squares discriminant analysis.

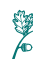

Supplement: Supp_Fig4.pdf [file Supp_Fig4.pdf]
