# Supplementary material for: Identification of Terpenoid Chemotypes Among High (−)-trans-Δ9- Tetrahydrocannabinol-Producing Cannabis sativa L. Cultivars
Source: PubMed Central journal article supplement (PMC5436332; doi:10.1089/can.2016.0040), 2017-03-01

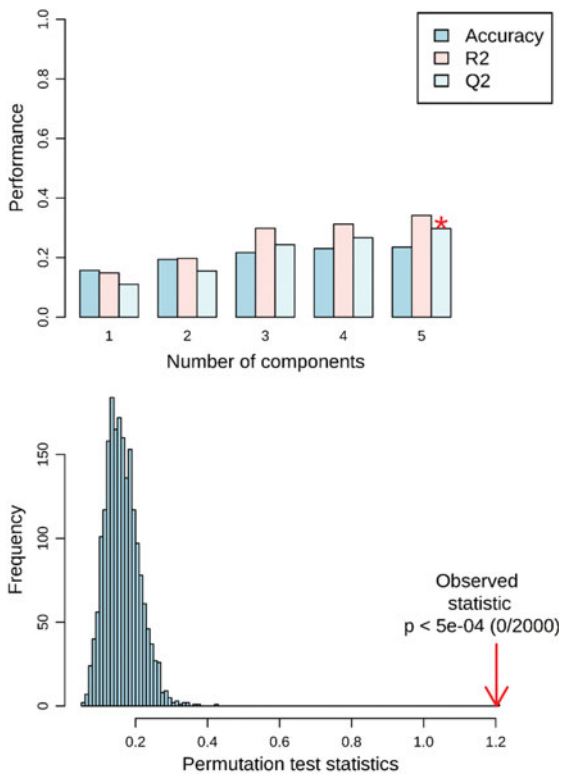

**SUPPLEMENTARY FIG. S5.** PLS-DA cross-validation results with cultivar names as classes (top). Permutation test results with cultivar names as classes (bottom). \*Best performance of model. PLS-DA, partial least squares discriminant analysis.

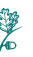

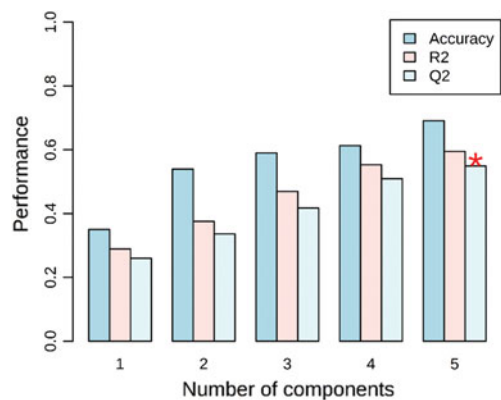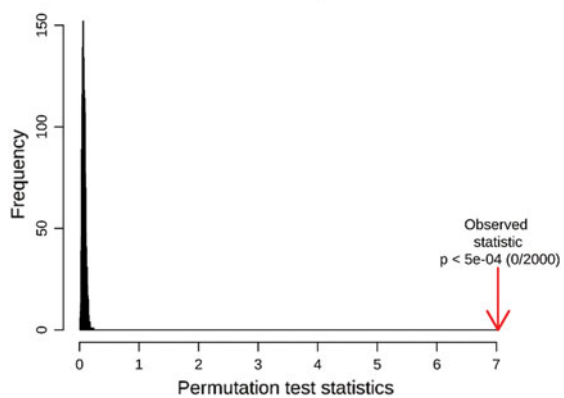

**SUPPLEMENTARY FIG. S6.** PLS-DA cross-validation results with class names as classes (top). Permutation test results with class names as classes (bottom). \*Best performance of model.

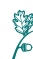

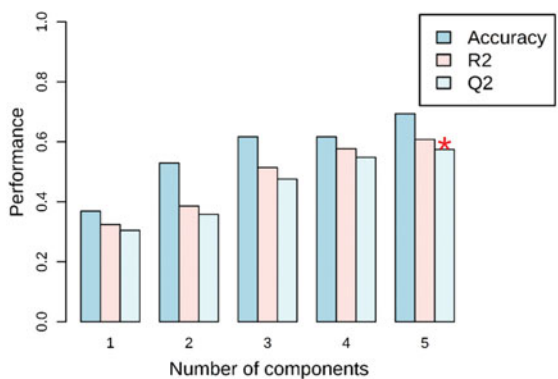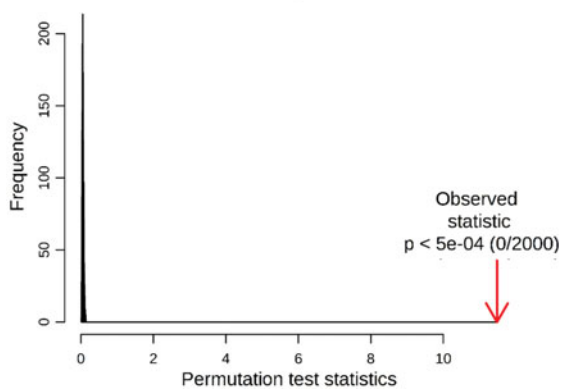

**SUPPLEMENTARY FIG. S7.** PLS-DA cross-validation results with new samples added to classes (top). Permutation test results with new samples added to classes (bottom). \*Best performance of model.



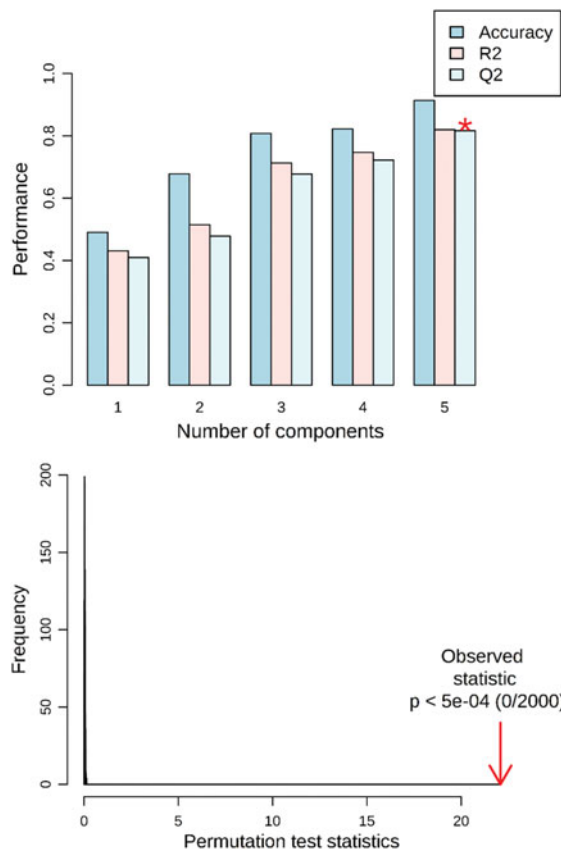

**SUPPLEMENTARY FIG. S8.** PLS-DA cross-validation results with classes containing  $n \geq 15$  samples (top). Permutation test results with classes containing  $n \geq 15$  samples (bottom). \*Best performance of model.

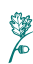

Supplement: Supp_Fig5-8.pdf [file Supp_Fig5-8.pdf]
